# Supplementary material for: Identification of a Sacral, Visceral Sensory Transcriptome in Embryonic and Adult Mice
Source: eNeuro. 2020 Feb 19;7(1):ENEURO.0397-19.2019. doi: 10.1523/ENEURO.0397-19.2019 (PMC7036621; doi:10.1523/ENEURO.0397-19.2019)
Supplement: Extended Data Figure 2-1 — Curated gene sets associated with neuronal signaling, nociceptor sensitization or specification. This list of genes is the focus of gene set enrichment analyses illustrated in Figures 2, 5. Download Figure 2-1, XLSX file. [file enu-eN-NWR-0397-19-s02.xlsx]

## Sheet: Figure 2-1
Extended Data Fig 2-1: Curated gene sets
Calcium_channels	GeneName	EnsemblID	Chr	Start	End	Strand
	Cacnb3	ENSMUSG00000003352	15	98462651	98474961	1
	Cacna1e	ENSMUSG00000004110	1	156239649	156573049	-1
	Cacna1b	ENSMUSG00000004113	2	24459407	24618672	-1
	Cacna2d2	ENSMUSG00000010066	9	107301943	107431677	1
	Cacna1d	ENSMUSG00000015968	14	30853135	31304342	-1
	Cacnb4	ENSMUSG00000017412	2	52283845	52532350	-1
	Cacng2	ENSMUSG00000019146	15	77822178	77950458	-1
	Cacng1	ENSMUSG00000020722	11	107564532	107577836	-1
	Cacng4	ENSMUSG00000020723	11	107593671	107655871	-1
	Cacnb1	ENSMUSG00000020882	11	97862822	97884348	-1
	Cacna2d3	ENSMUSG00000021991	14	29718133	30535050	-1
	Cacna1i	ENSMUSG00000022416	15	80117668	80228709	1
	Cacna1h	ENSMUSG00000024112	17	25511230	25570728	-1
	Cacna1a	ENSMUSG00000034656	8	86912339	87164145	1
	Cacna2d1	ENSMUSG00000040118	5	15440509	15880329	1
	Cacng5	ENSMUSG00000040373	11	107735919	107776369	-1
	Cacna1c	ENSMUSG00000051331	6	118542314	119146249	-1
	Cacng8	ENSMUSG00000053395	7	3394567	3415366	1
	Cacnb2	ENSMUSG00000057914	2	14525933	14909535	1
	Cacng3	ENSMUSG00000066189	7	129815258	129912905	1
	Cacng7	ENSMUSG00000069806	7	3333055	3367810	1
Chloride_channels	GeneName	EnsemblID	Chr	Start	End	Strand
	Clcn4-2	ENSMUSG00000000605	7	7235027	7252222	-1
	Clcn5	ENSMUSG00000004317	X	6730936	6896484	-1
	Clcn3	ENSMUSG00000004319	8	63389186	63462097	-1
	Clcn2	ENSMUSG00000022843	16	20703037	20717819	-1
	Clcc1	ENSMUSG00000027884	3	108456831	108481758	1
	Clcn6	ENSMUSG00000029016	4	147378368	147412930	-1
	Ttyh1	ENSMUSG00000030428	7	4071010	4088308	1
	Ano1	ENSMUSG00000031075	7	151774454	151937879	-1
	Ttyh2	ENSMUSG00000034714	11	114536745	114582291	1
	Ttyh3	ENSMUSG00000036565	5	141096540	141124985	-1
	Clcn7	ENSMUSG00000036636	17	25270336	25299049	1
G-protein_coupled_receptors	GeneName	EnsemblID	Chr	Start	End	Strand
	Gprc5b	ENSMUSG00000008734	7	126115554	126138725	-1
	Ptger1	ENSMUSG00000019464	8	86190732	86196652	1
	F2rl2	ENSMUSG00000021675	13	96466808	96472694	1
	Htr1a	ENSMUSG00000021721	13	106233773	106238213	1
	Drd3	ENSMUSG00000022705	16	43762334	43823045	1
	Grm8	ENSMUSG00000024211	6	27225121	28085178	-1
	Galr1	ENSMUSG00000024553	18	82561888	82576169	-1
	Htr7	ENSMUSG00000024798	19	36033224	36131997	-1
	Gpr35	ENSMUSG00000026271	1	94869696	94882968	1
	Htr4	ENSMUSG00000026322	18	62483858	62627456	1
	Adra1d	ENSMUSG00000027335	2	131371586	131388021	-1
	Oprl1	ENSMUSG00000027584	2	181449721	181455690	1
	P2ry1	ENSMUSG00000027765	3	60806717	60812901	1
	Npy2r	ENSMUSG00000028004	3	82342305	82352008	-1
	Ptgfr	ENSMUSG00000028036	3	151461882	151500594	-1
	Lphn2	ENSMUSG00000028184	3	148478550	148652280	-1
	Hcrtr1	ENSMUSG00000028778	4	129807461	129816603	-1
	Adcyap1r1	ENSMUSG00000029778	6	55401972	55451445	1
	C130060K24Rik	ENSMUSG00000029917	6	65331099	65408144	1
	Gpr64	ENSMUSG00000031298	X	156828622	156936002	1
	Grpr	ENSMUSG00000031364	X	159951836	159987609	-1
	Ednra	ENSMUSG00000031616	8	80186930	80248363	-1
	Hcrtr2	ENSMUSG00000032360	9	76073710	76171385	-1
	Pth1r	ENSMUSG00000032492	9	110624592	110649649	-1
	P2ry2	ENSMUSG00000032860	7	108145086	108160505	-1
	Cysltr2	ENSMUSG00000033470	14	73428935	73448921	-1
	Bai1	ENSMUSG00000034730	15	74346626	74419873	1
	Htr2a	ENSMUSG00000034997	14	75040647	75106666	1
	P2ry14	ENSMUSG00000036381	3	58918548	58934546	-1
	Lpar3	ENSMUSG00000036832	3	145883925	145949178	1
	Sstr4	ENSMUSG00000037014	2	148221113	148226239	1
	Gpr160	ENSMUSG00000037661	3	30754872	30796114	1
	Gpr162	ENSMUSG00000038390	6	124808462	124813935	-1
	Gpr37	ENSMUSG00000039904	6	25616894	25640729	-1
	Ptger3	ENSMUSG00000040016	3	157229856	157307722	1
	Ptgir	ENSMUSG00000043017	7	17491839	17496254	1
	Gpr149	ENSMUSG00000043441	3	62332999	62409062	-1
	Chrm2	ENSMUSG00000045613	6	36338084	36478414	1
	Chrm3	ENSMUSG00000046159	13	9876381	9878329	-1
	Mc4r	ENSMUSG00000047259	18	67017369	67020126	-1
	Sstr2	ENSMUSG00000047904	11	113480656	113487319	1
	Agtr1a	ENSMUSG00000049115	13	30428310	30474736	1
	Gpr3	ENSMUSG00000049649	4	132765255	132768451	-1
	Htr5b	ENSMUSG00000050534	1	123406419	123425042	-1
	Prokr2	ENSMUSG00000050558	2	132163469	132211183	-1
	Mrgpra1	ENSMUSG00000050650	7	54590245	54609610	-1
	Htr1f	ENSMUSG00000050783	16	64924555	65105610	-1
	Gprc5c	ENSMUSG00000051043	11	114712466	114733931	1
	Mrgprd	ENSMUSG00000051207	7	152500740	152509964	1
	Gpr116	ENSMUSG00000056492	17	43526415	43596506	1
	Ptafr	ENSMUSG00000056529	4	132119982	132138598	1
	Gpr139	ENSMUSG00000066197	7	126287837	126327888	-1
	Lpar5	ENSMUSG00000067714	6	125017938	125032490	1
	Mrgprb4	ENSMUSG00000070550	7	55453583	55454548	-1
	Mrgprx1	ENSMUSG00000070552	7	55276341	55282971	-1
	Htr1d	ENSMUSG00000070687	4	135979439	136000313	1
	Ptgdr	ENSMUSG00000071489	14	45470910	45479050	-1
	Mrgpra9	ENSMUSG00000074111	7	54490289	54491281	-1
	Mrgpra3	ENSMUSG00000078698	7	54844320	54856742	-1
Ligand_gated_ion_channels	GeneNames	EnsemblID	Chr	Start	End	Strand
	Gabra2	ENSMUSG00000000560	5	71352296	71487088	-1
	Gabrg1	ENSMUSG00000001260	5	71142286	71233856	-1
	Grik3	ENSMUSG00000001985	4	125167944	125391417	1
	Gria3	ENSMUSG00000001986	X	38754031	39031778	1
	Grin2d	ENSMUSG00000002771	7	53087253	53126298	-1
	Grik5	ENSMUSG00000003378	7	25794872	25857388	-1
	P2rx5	ENSMUSG00000005950	11	72973923	72986187	1
	Htr3b	ENSMUSG00000008590	9	48743113	48773095	-1
	Gabra1	ENSMUSG00000010803	11	41944441	41996432	-1
	Hcn2	ENSMUSG00000020331	10	79179379	79198853	1
	Gabrg2	ENSMUSG00000020436	11	41723697	41814359	-1
	Gria1	ENSMUSG00000020524	11	56824889	57143746	1
	Hcn1	ENSMUSG00000021730	13	118391287	118765609	1
	Grina	ENSMUSG00000022564	15	76077237	76080334	1
	P2rx6	ENSMUSG00000022758	16	17561978	17577893	1
	Grik1	ENSMUSG00000022935	16	87896441	88289947	-1
	Gabbr1	ENSMUSG00000024462	17	37182911	37212012	1
	Gria4	ENSMUSG00000025892	9	4417899	4796234	-1
	Grin1	ENSMUSG00000026959	2	25146701	25174707	-1
	P2rx3	ENSMUSG00000027071	2	84838740	84877619	-1
	Chrna4	ENSMUSG00000027577	2	180753085	180778251	-1
	Chrnb2	ENSMUSG00000027950	3	89557370	89568554	-1
	Glrb	ENSMUSG00000028020	3	80647521	80717582	-1
	Hcn3	ENSMUSG00000028051	3	88949996	88964118	-1
	Gabrd	ENSMUSG00000029054	4	154759089	154772221	-1
	Gabrb1	ENSMUSG00000029212	5	72091171	72529628	1
	P2rx7	ENSMUSG00000029468	5	123093920	123141441	1
	P2rx4	ENSMUSG00000029470	5	123157593	123179747	1
	P2rx2	ENSMUSG00000029503	5	110768831	110772168	-1
	Chrna7	ENSMUSG00000030525	7	70243578	70357455	-1
	Gabra3	ENSMUSG00000031343	X	69678020	69902187	-1
	Chrna6	ENSMUSG00000031491	8	28513686	28524416	-1
	Chrnb3	ENSMUSG00000031492	8	28479183	28510201	1
	Grik4	ENSMUSG00000032017	9	42326218	42752576	-1
	Htr3a	ENSMUSG00000032269	9	48707319	48719204	-1
	Chrna3	ENSMUSG00000032303	9	54859150	54874366	-1
	Hcn4	ENSMUSG00000032338	9	58671319	58708762	1
	Gabrb3	ENSMUSG00000033676	7	64845888	65084172	1
	Gria2	ENSMUSG00000033981	3	80488858	80606713	-1
	Chrnb4	ENSMUSG00000035200	9	54875963	54896351	-1
	Grin3a	ENSMUSG00000039579	4	49674483	49858616	-1
	Gabbr2	ENSMUSG00000039809	4	46675190	47004745	-1
	Grid1	ENSMUSG00000041078	14	35633011	36396565	1
	Gabrg3	ENSMUSG00000055026	7	63971835	64642558	-1
	Gabra5	ENSMUSG00000055078	7	64663060	64765379	-1
	Grik2	ENSMUSG00000056073	10	48819266	49508572	-1
	Grid2	ENSMUSG00000071424	6	63205870	64618276	1
Neurotrophic_factor_receptors	GeneName	EnsemblID	Chr	Start	End	Strand
	Ngfr	ENSMUSG00000000120	11	95430132	95449049	-1
	Gfra2	ENSMUSG00000022103	14	71289927	71379645	1
	Gfra3	ENSMUSG00000024366	18	34849557	34880041	-1
	Gfra1	ENSMUSG00000025089	19	58310094	58530399	-1
	Ntrk1	ENSMUSG00000028072	3	87582166	87599084	-1
	Ret	ENSMUSG00000030110	6	118101766	118147762	-1
	Ntrk2	ENSMUSG00000055254	13	58907957	59235331	1
	Ntrk3	ENSMUSG00000059146	7	85337248	85723294	-1
Neurotrophic_factors	GeneName	EnsemblID	Chr	Start	End	Strand
	Bdnf	ENSMUSG00000048482	2	109514857	109567164	1
	Ngf	ENSMUSG00000027859	3	102273851	102324936	1
	Ntf3	ENSMUSG00000049107	6	126051431	126116762	-1
	Artn	ENSMUSG00000028539	4	117598767	117602368	-1
	Gdnf	ENSMUSG00000022144	15	7761011	7787575	1
	Nrtn	ENSMUSG00000039481	17	56890748	56896953	-1
	Ntf5	ENSMUSG00000074121	7	52669065	52672548	1
Potassium_channels	GeneName	EnsemblID	Chr	Start	End	Strand
	Kcnn3	ENSMUSG00000000794	3	89324086	89471683	1
	Kctd10	ENSMUSG00000001098	5	114813576	114830524	-1
	Kcnh6	ENSMUSG00000001901	11	105869438	105895863	1
	Kcnn1	ENSMUSG00000002908	8	73365948	73380907	-1
	Kcnd1	ENSMUSG00000009731	X	7399415	7415406	1
	Kcnq2	ENSMUSG00000016346	2	180810284	180869996	-1
	Kctd5	ENSMUSG00000016946	17	24184701	24210452	-1
	Kcnmb1	ENSMUSG00000020155	11	33863013	33873641	1
	Kcnv1	ENSMUSG00000022342	15	44937830	44946480	-1
	Kcnk4	ENSMUSG00000024957	19	7000200	7009005	-1
	Kctd3	ENSMUSG00000026608	1	190794977	190831719	-1
	Kcnab1	ENSMUSG00000027827	3	64913306	65182145	1
	Kcnq5	ENSMUSG00000028033	1	21388484	21952023	-1
	Kcnq4	ENSMUSG00000028631	4	120368743	120421217	-1
	Kcnip4	ENSMUSG00000029088	5	48780741	49916143	-1
	Kctd15	ENSMUSG00000030499	7	35424033	35440528	-1
	Kcnk10	ENSMUSG00000033854	12	99672204	99816150	-1
	Kcnk1	ENSMUSG00000033998	8	128519002	128554583	1
	Kctd9	ENSMUSG00000034327	14	68333994	68360367	1
	Kcnh5	ENSMUSG00000034402	12	75998204	76278319	-1
	Kcnc2	ENSMUSG00000035681	10	111708179	111903360	1
	Kctd1	ENSMUSG00000036225	18	15127194	15309955	-1
	Kcnmb2	ENSMUSG00000037610	3	31801429	32099102	1
	Kcnk2	ENSMUSG00000037624	1	191031816	191167711	-1
	Kcnj9	ENSMUSG00000038026	1	174251164	174259394	-1
	Kcna6	ENSMUSG00000038077	6	126658347	126690680	-1
	Kcnh2	ENSMUSG00000038319	5	23825407	23857422	-1
	Kcns1	ENSMUSG00000040164	2	163989355	163996849	-1
	Kcna2	ENSMUSG00000040724	3	106904485	106909797	1
	Kcnd3	ENSMUSG00000040896	3	105255248	105476920	1
	Kcnk18	ENSMUSG00000040901	19	59294138	59311860	1
	Kcnj2	ENSMUSG00000041695	11	110927478	110938135	1
	Kcna4	ENSMUSG00000042604	2	107130796	107138659	1
	Kcns3	ENSMUSG00000043673	12	11097008	11157648	-1
	Kcnj10	ENSMUSG00000044708	1	174271341	174304216	1
	Kctd21	ENSMUSG00000044952	7	104480837	104498723	1
	Kcng3	ENSMUSG00000045053	17	83985297	84031235	-1
	Kcng4	ENSMUSG00000045246	8	122147754	122159580	-1
	Kcnk13	ENSMUSG00000045404	12	101202709	101300892	1
	Kcna1	ENSMUSG00000047976	6	126586481	126595819	-1
	Kcnk12	ENSMUSG00000050138	17	88145177	88197334	-1
	Kcnb1	ENSMUSG00000050556	2	166928878	167015655	-1
	Kctd16	ENSMUSG00000051401	18	40418015	40690757	1
	Kcnj16	ENSMUSG00000051497	11	110829347	110889282	1
	Kcnf1	ENSMUSG00000051726	12	17178908	17183694	-1
	Kcnt2	ENSMUSG00000052726	1	142142793	142508640	1
	Kcnn4	ENSMUSG00000054342	7	25155282	25170228	1
	Kcnn2	ENSMUSG00000054477	18	45428659	45845678	1
	Kcnmb4	ENSMUSG00000054934	10	115854917	115910934	-1
	Kcnq3	ENSMUSG00000056258	15	65826733	66117786	-1
	Kcnt1	ENSMUSG00000058740	2	25719315	25773793	1
	Kcnc1	ENSMUSG00000058975	7	53651867	53693745	1
	Kcnh7	ENSMUSG00000059742	2	62531471	63022344	-1
	Kcng2	ENSMUSG00000059852	18	80492368	80493072	-1
	Kcnd2	ENSMUSG00000060882	6	21165503	21679805	1
	Kcnc3	ENSMUSG00000062785	7	51846034	51860124	1
	Kcnma1	ENSMUSG00000063142	14	24117983	24622526	-1
	Kcnj11	ENSMUSG00000070561	7	53352533	53355607	-1
	Kcng1	ENSMUSG00000074575	2	168085617	168107236	-1
Sodium_channels	GeneName	EnsemblID	Chr	Start	End	Strand
	Scn4a	ENSMUSG00000001027	11	106179906	106214602	-1
	Scn1b	ENSMUSG00000019194	7	31901544	31911964	-1
	Scnn1a	ENSMUSG00000030340	6	125270677	125294961	1
	Scn11a	ENSMUSG00000034115	9	119662881	119734574	-1
	Scn10a	ENSMUSG00000034533	9	119517584	119603478	-1
	Scn7a	ENSMUSG00000034810	2	66511482	66622971	-1
	Scn4b	ENSMUSG00000046480	9	44946520	44962235	1
	Scn3b	ENSMUSG00000049281	9	40076801	40099203	1
	Scn3a	ENSMUSG00000057182	2	65295175	65405684	-1
	Scn1a	ENSMUSG00000064329	2	66108838	66278897	-1
	Scn9a	ENSMUSG00000075316	2	66318137	66473009	-1
	Scn2a1	ENSMUSG00000075318	2	65458914	65605504	1
Transcription_factors	GeneName	EnsemblID	Chr	Start	End	Strand
	Bcl11a	ENSMUSG00000000861	11	23978056	24074123	1
	Rarg	ENSMUSG00000001288	15	102065369	102087948	-1
	Hoxc8	ENSMUSG00000001657	15	102821053	102824698	1
	Etv1	ENSMUSG00000004151	12	39505967	39594802	1
	Klf5	ENSMUSG00000005148	14	99697910	99712624	1
	Elk3	ENSMUSG00000008398	10	92710159	92773880	-1
	Ebf3	ENSMUSG00000010476	7	144385356	144506128	-1
	Myt1	ENSMUSG00000010505	2	181498037	181562502	1
	Etv5	ENSMUSG00000013089	16	22381382	22439792	-1
	Camta1	ENSMUSG00000014592	4	150433633	151235985	-1
	Lcorl	ENSMUSG00000015882	5	46088420	46248854	-1
	Fli1	ENSMUSG00000016087	9	32229793	32348974	-1
	Eya2	ENSMUSG00000017897	2	165480798	165597227	1
	Hey2	ENSMUSG00000019789	10	30552165	30562607	-1
	Hoxb9	ENSMUSG00000020875	11	96132771	96137909	1
	Esrrb	ENSMUSG00000021255	12	87702067	87862578	1
	Nr1d2	ENSMUSG00000021775	14	19036568	19071641	-1
	Vdr	ENSMUSG00000022479	15	97684856	97741061	-1
	Runx1	ENSMUSG00000022952	16	92601712	92826311	-1
	Satb1	ENSMUSG00000023927	17	51875512	51972615	-1
	Lbh	ENSMUSG00000024063	17	73267645	73291282	1
	Pou4f3	ENSMUSG00000024497	18	42554193	42556903	1
	Pde8a	ENSMUSG00000025584	7	88358482	88479419	1
	Npas2	ENSMUSG00000026077	1	39250576	39420079	1
	Lrrfip1	ENSMUSG00000026305	1	92895304	93025521	1
	Esrrg	ENSMUSG00000026610	1	189432670	190038764	1
	Irf6	ENSMUSG00000026638	1	194979306	194998236	1
	Meis2	ENSMUSG00000027210	2	115688800	115891575	-1
	Creb3l1	ENSMUSG00000027230	2	91822485	91864659	-1
	Smad9	ENSMUSG00000027796	3	54559504	54605179	1
	Bnc2	ENSMUSG00000028487	4	83918446	84321179	-1
	Casz1	ENSMUSG00000028977	4	148178538	148328998	1
	Ppargc1a	ENSMUSG00000029167	5	51845488	51958964	-1
	Pgr	ENSMUSG00000031870	9	8900419	8965425	1
	Ets1	ENSMUSG00000032035	9	32443806	32565405	1
	Ppargc1b	ENSMUSG00000033871	18	61457790	61560085	-1
	Prdm8	ENSMUSG00000035456	5	98609888	98616467	1
	Pknox2	ENSMUSG00000035934	9	36697550	36954899	-1
	Zfp57	ENSMUSG00000036036	17	37138108	37147580	1
	Elf1	ENSMUSG00000036461	14	79881001	79982283	1
	Zcchc12	ENSMUSG00000036699	X	33735899	33739153	1
	Grhl3	ENSMUSG00000037188	4	135097803	135129545	-1
	Nr0b2	ENSMUSG00000037583	4	133109291	133112451	1
	Egr2	ENSMUSG00000037868	10	66998223	67004936	1
	Creg1	ENSMUSG00000040713	1	167693877	167705439	1
	Onecut1	ENSMUSG00000043013	9	74709728	74739282	1
	Zfp423	ENSMUSG00000045333	8	90185709	90483494	-1
	Insm2	ENSMUSG00000045440	12	56699904	56703005	1
	Scrt1	ENSMUSG00000048385	15	76346633	76352559	-1
	Pdlim1	ENSMUSG00000055044	19	40296731	40346106	-1
	Maf	ENSMUSG00000055435	8	118206842	118231694	-1
	Dach1	ENSMUSG00000055639	14	98186066	98568984	-1
	Hoxb8	ENSMUSG00000056648	11	96143219	96146639	1
	Lmcd1	ENSMUSG00000057604	6	112223752	112280419	1
	Zbtb16	ENSMUSG00000066687	9	48462416	48644050	-1
	Runx3	ENSMUSG00000070691	4	134676567	134733905	1
	Klf12	ENSMUSG00000072294	14	100269869	100549015	-1
TRP_channels	GeneName	EnsemblID	Chr	Start	End	Strand
	Trpv1	ENSMUSG00000005952	11	73047794	73074744	1
	Trpm2	ENSMUSG00000009292	10	77370467	77433308	-1
	Trpv4	ENSMUSG00000014158	5	115072161	115108430	-1
	Trpv2	ENSMUSG00000018507	11	62387988	62414017	1
	Trpc7	ENSMUSG00000021541	13	56874474	56997150	-1
	Trpm6	ENSMUSG00000024727	19	18824473	18967000	1
	Trpm7	ENSMUSG00000027365	2	126617301	126701966	-1
	Trpc3	ENSMUSG00000027716	3	36519404	36589089	-1
	Trpc4	ENSMUSG00000027748	3	53959979	54122389	1
	Trpc6	ENSMUSG00000031997	9	8544432	8680565	1
	Trpa1	ENSMUSG00000032769	1	14862729	14908943	-1
	Trpc1	ENSMUSG00000032839	9	95607046	95650777	-1
	Trpm8	ENSMUSG00000036251	1	90174236	90285868	1
	Trpm4	ENSMUSG00000038260	7	52558002	52589150	-1
	Trpc5	ENSMUSG00000041710	X	140816214	141122723	-1
	Trpm3	ENSMUSG00000052387	19	22213609	23064374	1
	Trpc2	ENSMUSG00000070425	7	109214025	109245378	1
