# Supplementary material for: Identification of a Sacral, Visceral Sensory Transcriptome in Embryonic and Adult Mice
Source: eNeuro. 2020 Feb 19;7(1):ENEURO.0397-19.2019. doi: 10.1523/ENEURO.0397-19.2019 (PMC7036621; doi:10.1523/ENEURO.0397-19.2019)
Supplement: Extended Data Figure 2-2 — Gene set enrichment analyses for Adult and Trpv1 DRG. From the full curated gene set (Extended Data Fig. 2-1), these genes were identified as differentially expressed between lumbar and sacral DRG for the total adult or the Trpv1 adult dataset. These genes are illustrated in Figures 2, 5 and Extended Data Figures 2-3, 5-1. Download Figure 2-2, XLSX file. [file enu-eN-NWR-0397-19-s03.xlsx]

## Sheet: Figure 2-2
Extended Data Fig 2-2: Gene set enrichment analyses for Adult and Trpv1 DRG
Adult DRG (total)				Trpv1 DRG
GeneSet	Symbol	Ensembl_ID		GeneSet	Symbol	Ensembl_ID
LGIC	Chrna3	ENSMUSG00000032303		LGIC	Htr3a	ENSMUSG00000032269
LGIC	Chrnb4	ENSMUSG00000035200		LGIC	Gabrg3	ENSMUSG00000055026
LGIC	Gabrg3	ENSMUSG00000055026		LGIC	Chrnb4	ENSMUSG00000035200
LGIC	Grin3a	ENSMUSG00000039579		LGIC	Gabra3	ENSMUSG00000031343
LGIC	Chrnb3	ENSMUSG00000031492		LGIC	Grin3a	ENSMUSG00000039579
LGIC	Gabra3	ENSMUSG00000031343		LGIC	Chrna3	ENSMUSG00000032303
LGIC	Htr3a	ENSMUSG00000032269		LGIC	Grik3	ENSMUSG00000001985
LGIC	Chrna7	ENSMUSG00000030525		LGIC	P2rx7	ENSMUSG00000029468
TFS	Hoxb9	ENSMUSG00000020875		LGIC	Gria3	ENSMUSG00000001986
TFS	Hoxc8	ENSMUSG00000001657		LGIC	Gabrg2	ENSMUSG00000020436
TFS	Egr2	ENSMUSG00000037868		LGIC	Hcn4	ENSMUSG00000032338
TFS	Runx3	ENSMUSG00000070691		LGIC	Gabbr1	ENSMUSG00000024462
TFS	Zcchc12	ENSMUSG00000036699		LGIC	Grin1	ENSMUSG00000026959
TFS	Maf	ENSMUSG00000055435		LGIC	Chrnb2	ENSMUSG00000027950
TFS	Scrt1	ENSMUSG00000048385		LGIC	Grina	ENSMUSG00000022564
GPCC	Galr1	ENSMUSG00000024553		LGIC	Chrnb3	ENSMUSG00000031492
GPCC	Gprc5b	ENSMUSG00000008734		LGIC	Gabbr2	ENSMUSG00000039809
GPCC	Gpr64	ENSMUSG00000031298		LGIC	Gria1	ENSMUSG00000020524
GPCC	Oprl1	ENSMUSG00000027584		LGIC	Gabrb3	ENSMUSG00000033676
GPCC	F2rl2	ENSMUSG00000021675		LGIC	Gria2	ENSMUSG00000033981
GPCC	Prokr2	ENSMUSG00000050558		LGIC	Hcn3	ENSMUSG00000028051
GPCC	Htr1d	ENSMUSG00000070687		LGIC	Chrna6	ENSMUSG00000031491
NTFs	Gfra3	ENSMUSG00000024366		LGIC	Hcn2	ENSMUSG00000020331
NTFs	Ntrk2	ENSMUSG00000055254		LGIC	Grid1	ENSMUSG00000041078
NTFs	Ntrk3	ENSMUSG00000059146		LGIC	Gabrb1	ENSMUSG00000029212
CA	Cacna2d1	ENSMUSG00000040118		LGIC	Hcn1	ENSMUSG00000021730
CA	Cacna1e	ENSMUSG00000004110		LGIC	Htr3b	ENSMUSG00000008590
CA	Cacna1h	ENSMUSG00000024112		LGIC	P2rx2	ENSMUSG00000029503
CA	Cacng2	ENSMUSG00000019146		LGIC	P2rx3	ENSMUSG00000027071
K	Kcnk2	ENSMUSG00000037624		LGIC	Grik2	ENSMUSG00000056073
K	Kcna1	ENSMUSG00000047976		LGIC	Chrna7	ENSMUSG00000030525
K	Kcnmb2	ENSMUSG00000037610		LGIC	Grik4	ENSMUSG00000032017
K	Kcnc3	ENSMUSG00000062785		LGIC	P2rx4	ENSMUSG00000029470
K	Kcng4	ENSMUSG00000045246		LGIC	Grik1	ENSMUSG00000022935
TRP	Trpv1	ENSMUSG00000005952		LGIC	Gabra1	ENSMUSG00000010803
TRP	Trpc4	ENSMUSG00000027748		K	Kcnj10	ENSMUSG00000044708
				K	Kcnn4	ENSMUSG00000054342
				K	Kcnj16	ENSMUSG00000051497
				K	Kcns3	ENSMUSG00000043673
				K	Kcnk2	ENSMUSG00000037624
				K	Kctd10	ENSMUSG00000001098
				K	Kcnmb2	ENSMUSG00000037610
				K	Kcnc2	ENSMUSG00000035681
				K	Kcnq4	ENSMUSG00000028631
				K	Kcnq2	ENSMUSG00000016346
				K	Kcnd3	ENSMUSG00000040896
				K	Kcna4	ENSMUSG00000042604
				K	Kcnd1	ENSMUSG00000009731
				K	Kctd1	ENSMUSG00000036225
				K	Kcnn1	ENSMUSG00000002908
				K	Kcnq5	ENSMUSG00000028033
				K	Kctd9	ENSMUSG00000034327
				K	Kcnb1	ENSMUSG00000050556
				K	Kctd3	ENSMUSG00000026608
				K	Kcnh6	ENSMUSG00000001901
				K	Kcng3	ENSMUSG00000045053
				K	Kcnmb4	ENSMUSG00000054934
				K	Kcnn2	ENSMUSG00000054477
				K	Kctd15	ENSMUSG00000030499
				K	Kcnc1	ENSMUSG00000058975
				K	Kcnip4	ENSMUSG00000029088
				K	Kcnk4	ENSMUSG00000024957
				K	Kctd21	ENSMUSG00000044952
				K	Kcnf1	ENSMUSG00000051726
				K	Kcns1	ENSMUSG00000040164
				K	Kcna1	ENSMUSG00000047976
				K	Kctd16	ENSMUSG00000051401
				K	Kcnh7	ENSMUSG00000059742
				K	Kcnh2	ENSMUSG00000038319
				K	Kcnt1	ENSMUSG00000058740
				K	Kcnc3	ENSMUSG00000062785
				K	Kcna6	ENSMUSG00000038077
				TFS	Pou4f3	ENSMUSG00000024497
				TFS	Hey2	ENSMUSG00000019789
				TFS	Maf	ENSMUSG00000055435
				TFS	Hoxc8	ENSMUSG00000001657
				TFS	Pgr	ENSMUSG00000031870
				TFS	Etv5	ENSMUSG00000013089
				TFS	Ebf3	ENSMUSG00000010476
				TFS	Camta1	ENSMUSG00000014592
				TFS	Klf12	ENSMUSG00000072294
				TFS	Prdm8	ENSMUSG00000035456
				TFS	Insm2	ENSMUSG00000045440
				TFS	Bcl11a	ENSMUSG00000000861
				TFS	Irf6	ENSMUSG00000026638
				TFS	Ppargc1a	ENSMUSG00000029167
				TFS	Smad9	ENSMUSG00000027796
				TFS	Creg1	ENSMUSG00000040713
				TFS	Zcchc12	ENSMUSG00000036699
				TFS	Meis2	ENSMUSG00000027210
				TFS	Runx1	ENSMUSG00000022952
				TFS	Casz1	ENSMUSG00000028977
				TFS	Elk3	ENSMUSG00000008398
				TFS	Elf1	ENSMUSG00000036461
				TFS	Myt1	ENSMUSG00000010505
				TFS	Rarg	ENSMUSG00000001288
				TFS	Fli1	ENSMUSG00000016087
				TFS	Pdlim1	ENSMUSG00000055044
				TFS	Nr1d2	ENSMUSG00000021775
				TFS	Ets1	ENSMUSG00000032035
				TFS	Lbh	ENSMUSG00000024063
				TFS	Egr2	ENSMUSG00000037868
				TFS	Klf5	ENSMUSG00000005148
				CA	Cacna1e	ENSMUSG00000004110
				CA	Cacng5	ENSMUSG00000040373
				CA	Cacna1h	ENSMUSG00000024112
				CA	Cacna1b	ENSMUSG00000004113
				CA	Cacna2d1	ENSMUSG00000040118
				CA	Cacna2d2	ENSMUSG00000010066
				CA	Cacnb4	ENSMUSG00000017412
				CA	Cacng3	ENSMUSG00000066189
				CA	Cacna1c	ENSMUSG00000051331
				CA	Cacnb3	ENSMUSG00000003352
				CA	Cacnb1	ENSMUSG00000020882
				CA	Cacng4	ENSMUSG00000020723
				CA	Cacna1i	ENSMUSG00000022416
				CA	Cacng7	ENSMUSG00000069806
				NTFR	Ngfr	ENSMUSG00000000120
				NTFR	Ret	ENSMUSG00000030110
				NTFR	Ntrk2	ENSMUSG00000055254
				NTFR	Gfra3	ENSMUSG00000024366
				NTFR	Gfra1	ENSMUSG00000025089
				NTFR	Ntrk1	ENSMUSG00000028072
				NTFR	Gfra2	ENSMUSG00000022103
				CL	Ttyh1	ENSMUSG00000030428
				CL	Clcn5	ENSMUSG00000004317
				CL	Ttyh2	ENSMUSG00000034714
				CL	Clcn4-2	ENSMUSG00000000605
				CL	Clcn6	ENSMUSG00000029016
				CL	Clcn3	ENSMUSG00000004319
				CL	Clcc1	ENSMUSG00000027884
				CL	Clcn2	ENSMUSG00000022843
				NA	Scn7a	ENSMUSG00000034810
				NA	Scn9a	ENSMUSG00000075316
				NA	Scn11a	ENSMUSG00000034115
				NA	Scn3b	ENSMUSG00000049281
				NA	Scn10a	ENSMUSG00000034533
				NA	Scn3a	ENSMUSG00000057182
				NA	Scn1a	ENSMUSG00000064329
				NA	Scn1b	ENSMUSG00000019194
				TRP	Trpm2	ENSMUSG00000009292
				TRP	Trpv1	ENSMUSG00000005952
				TRP	Trpc4	ENSMUSG00000027748
				TRP	Trpv2	ENSMUSG00000018507
				TRP	Trpc1	ENSMUSG00000032839
				TRP	Trpm8	ENSMUSG00000036251
				TRP	Trpc3	ENSMUSG00000027716
				TRP	Trpa1	ENSMUSG00000032769
				GPCR	Prokr2	ENSMUSG00000050558
				GPCR	Ptgir	ENSMUSG00000043017
				GPCR	Gpr64	ENSMUSG00000031298
				GPCR	Htr5b	ENSMUSG00000050534
				GPCR	Sstr4	ENSMUSG00000037014
				GPCR	Galr1	ENSMUSG00000024553
				GPCR	F2rl2	ENSMUSG00000021675
				GPCR	Ednra	ENSMUSG00000031616
				GPCR	P2ry1	ENSMUSG00000027765
				GPCR	Mrgpra3	ENSMUSG00000078698
				GPCR	Chrm2	ENSMUSG00000045613
				GPCR	Gprc5b	ENSMUSG00000008734
				GPCR	Mrgprb4	ENSMUSG00000070550
				GPCR	Htr2a	ENSMUSG00000034997
				GPCR	Lphn2	ENSMUSG00000028184
				GPCR	Npy2r	ENSMUSG00000028004
				GPCR	Adcyap1r1	ENSMUSG00000029778
				GPCR	Gpr35	ENSMUSG00000026271
				GPCR	Ptgdr	ENSMUSG00000071489
				GPCR	Gpr139	ENSMUSG00000066197
